# Supplementary material for: Co0.85Se bundle-like nanostructure catalysts for hydrogenation of 4-nitrophenol to 4-aminophenol
Source: Royal Society of Chemistry journal article supplement (doi:10.1039/c4nj01358a), 2014-09-26
Supplement: c4nj01358a1.pdf [file c4nj01358a1.pdf]

## Electronic Supplementary Information (ESI)

### **Co<sub>0.85</sub>Se bundle-like nanostructures catalysts for hydrogenation of 4-nitrophenol to 4-aminophenol†**

Zai-Xian Zhang,<sup>‡1</sup> Xian-Wen Wang,<sup>‡1</sup> Kong-Lin Wu,<sup>\*1</sup> Yao-Xiang Yue,<sup>1</sup> Meng-Li  
Zhao,<sup>1</sup> Juan Cheng,<sup>1</sup> Jiang Ming,<sup>1</sup> Chang-Jiang Yu,<sup>1</sup> and Xian-Wen Wei<sup>\*1, 2</sup>

<sup>1</sup> *College of Chemistry and Materials Science, the Key Laboratory of Functional Molecular Solids, the Ministry of Education, Anhui Laboratory of Molecular-Based Materials, Anhui Normal University, Wuhu, 241000, P. R. China.*

<sup>2</sup> *School of Chemical and Engineering, Anhui University of Technology, Maanshan 243002, P. R. China.*

*E-mail: konglin@mail.ahnu.edu.cn (K.-L. Wu); xwwei@mail.ahnu.edu.cn (X.-W. Wei);*

*Fax: +86 553-3869303.*

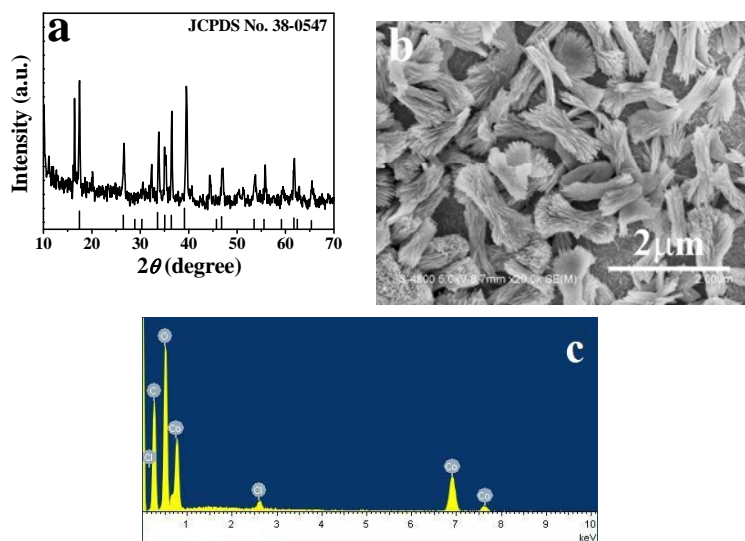

**Fig. S1** (a) XRD pattern, (b) SEM image, and (c) EDX spectrum of bundle-like  $\text{Co}(\text{CO}_3)_{0.35}\text{Cl}_{0.20}(\text{OH})_{1.10}$  precursor.

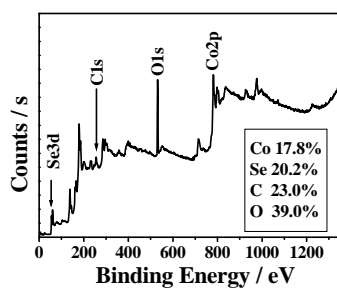

**Fig. S2** XPS survey spectrum of  $\text{Co}_{0.85}\text{Se}$  BNs.

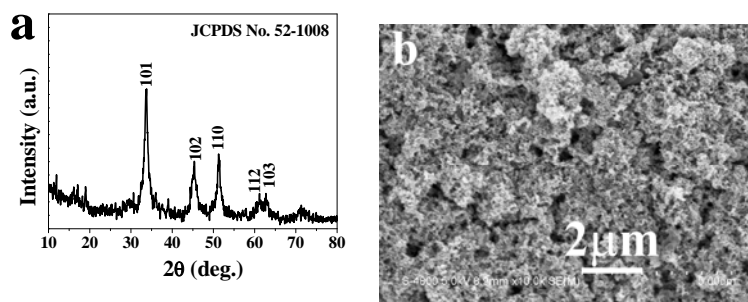

**Fig. S3** (a) XRD pattern and (b) SEM image of  $\text{Co}_{0.85}\text{Se}$  NPs.

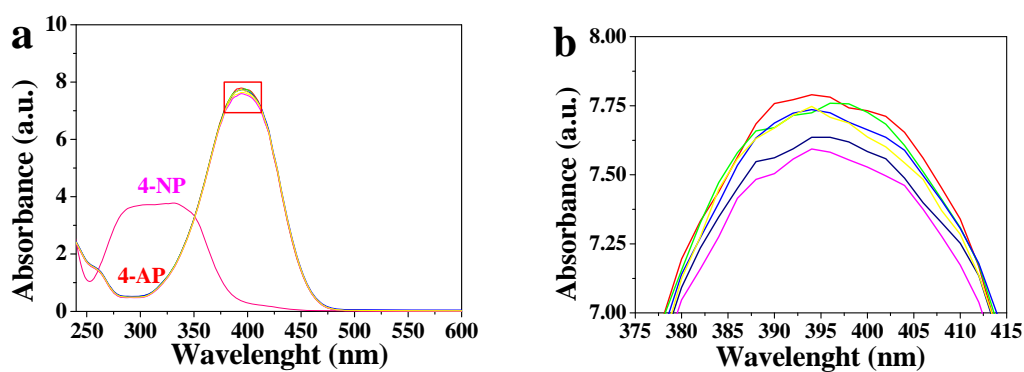

**Fig. S4** Time-dependent UV-vis absorption spectrum (a) and magnified view (375 nm to 415 nm) spectrum (b) changes for reducing of 4-nitrophenol into 4-aminophenol without catalyst.

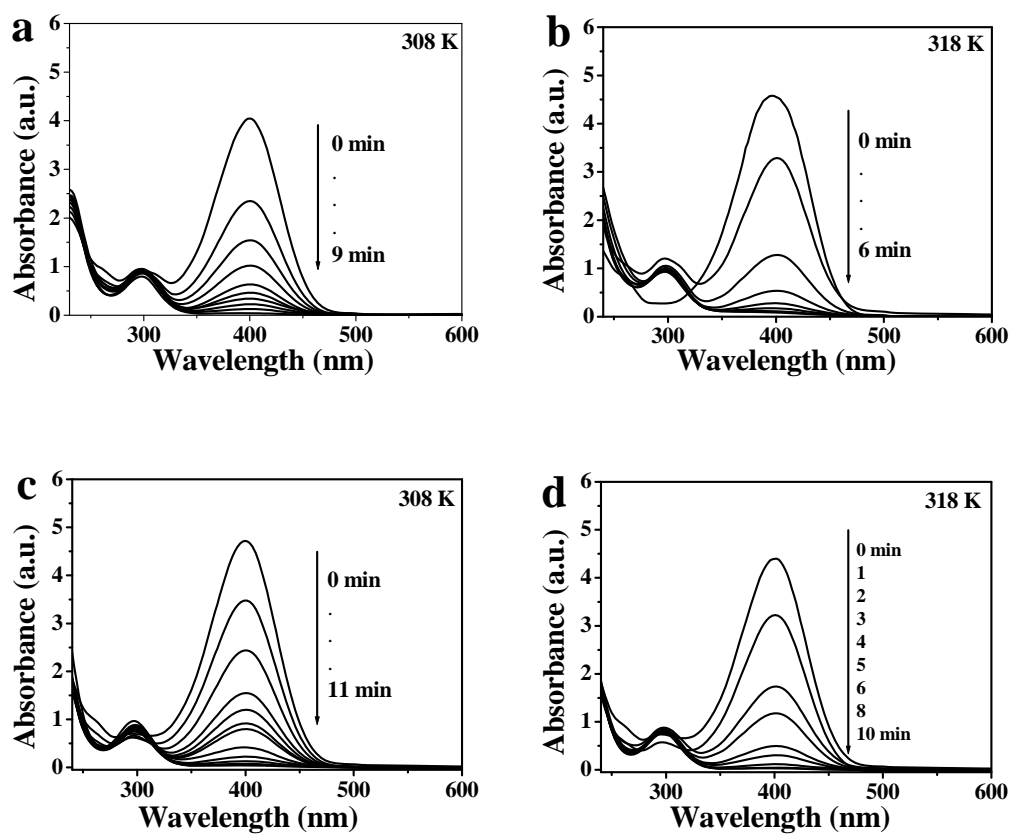

**Fig. S5** Time-dependent UV-vis absorption spectrum changes for reducing of 4-nitrophenol into 4-aminophenol by  $\text{Co}_{0.85}\text{Se}$  BNs (a, b) and NPs (c, d) at the temperatures of 308 K and 318 K, respectively.

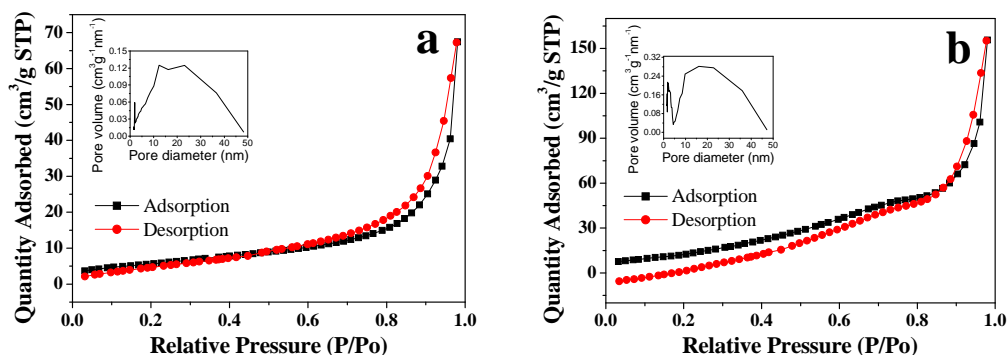

**Fig. S6** Nitrogen adsorption and desorption isotherms of (a)  $\text{Co}_{0.85}\text{Se}$  BNs and (b)  $\text{Co}_{0.85}\text{Se}$  NPs with corresponding pore-size distribution (inset) calculated by the BJH method from the desorption branch.

**Table S1** The linear correlation coefficients in the fitting process for the  $\text{Co}_{0.85}\text{Se}$  catalysts at three different temperatures.

| Catalysts                   | Kinetic equation       |                        |                        | Arrhenius equation    | Eyring equation        |
|-----------------------------|------------------------|------------------------|------------------------|-----------------------|------------------------|
|                             | 298 K                  | 308 K                  | 318 K                  |                       |                        |
| $\text{Co}_{0.85}\text{Se}$ | $y = -0.457x + 0.274$  | $y = -0.513x + 0.0644$ | $y = -0.673x + 0.0789$ | $y = -1.763x + 5.114$ | $y = -1.991x - 0.1077$ |
| BNs                         | R=0.9789               | R=0.9984               | R=0.9942               | R=0.9984              | R=0.9984               |
| $\text{Co}_{0.85}\text{Se}$ | $y = -0.311x + 0.6225$ | $y = -0.434x + 0.2839$ | $y = -0.530x + 0.0567$ | $y = -2.139x + 6.093$ | $y = -1.461x - 1.598$  |
| NPs                         | R=0.9561               | R=0.9831               | R=0.9927               | R=0.9984              | R=0.9984               |

**Table S2** The change in the percent recovery, reaction time, and conversion with repetitive use of  $\text{Co}_{0.85}\text{Se}$  BNs catalyst system in sequential reactions (Conditions: 4-nitrophenol, 10 mL, 0.5 mM;  $\text{Co}_{0.85}\text{Se}$  catalyst, 10 mL, 0.1 g/L;  $\text{NaBH}_4$ , 10 mL, 0.02 M; temperature, 298 K).

| Cycle numbers | Percent recovery of catalyst (%) | Reaction time (min) | Conversion (%) |
|---------------|----------------------------------|---------------------|----------------|
| 1             | ~94                              |                     | 100            |
| 2             | ~85                              |                     | ~98            |
| 3             | ~70                              | 10                  | ~94            |
| 4             | ~35                              |                     | ~66            |
| 5             | ~20                              |                     | ~45            |
